# Supplementary material for: Assessment of glenoid bone loss and other osseous shoulder pathologies comparing MR-based CT-like images with conventional CT
Source: Springer Nature journal article supplement (doi:10.1007/s00330-023-09939-9), 2023-07-15

**Assessment of glenoid bone loss and other osseous shoulder pathologies comparing  
CT-like MR-images with conventional CT**

**ELECTRONIC SUPPLEMENTARY MATERIAL**

**Supplementary Figure 1**

Complex scapula fracture of a 23-year-old patient after acute trauma showing sagittal images of a conventional CT scan (**A**) compared to inverted CT-like images acquired using UTE (**B**), FRACTURE (**C**) and T1 GRE sequences (**D**). Note the accurate presentation of the fracture borders on the CT-like MR sequences compared to CT (white arrows).

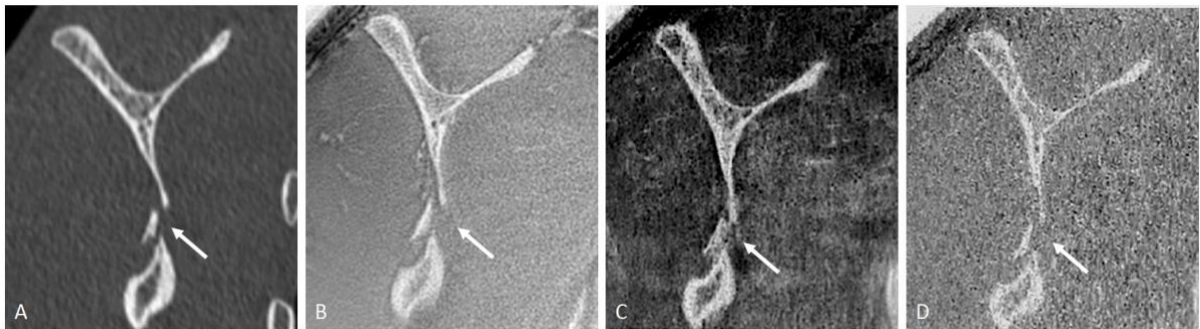

Supplement: MOESM1 [file 25800884]
